# Supplementary material for: Targeting de novo lipogenesis and the Lands cycle induces ferroptosis in KRAS-mutant lung cancer
Source: PubMed Central journal article supplement (PMC9325712; doi:10.1038/s41467-022-31963-4), 2022-07-26
Supplement: 41467_2022_31963_MOESM1_ESM.pdf [file 41467_2022_31963_MOESM1_ESM.pdf]

## Supplementary information

### **Targeting *de novo* lipogenesis and the Lands cycle induces ferroptosis in KRAS-mutant lung cancer**

Caterina Bartolacci<sup>1,#</sup>, Cristina Andreani<sup>1,#</sup>, Gonçalo Vias Do Vale<sup>2</sup>, Stefano Berto<sup>3</sup>, Margherita Melegari<sup>1</sup>, Anna C. Crouch<sup>4</sup>, Dodge L. Baluya<sup>5</sup>, George Kemble<sup>6</sup>, Kurt Hodges<sup>7</sup>, Jacqueline Starrett<sup>8</sup>, Katerina Politi<sup>8</sup>, Sandra L. Starnes<sup>9</sup>, Daniele Lorenzini<sup>10</sup>, Maria Gabriela Raso<sup>11</sup>, Luisa Solis Soto<sup>11</sup>, Carmen Behrens<sup>12</sup>, Humam Kadara<sup>11</sup>, Boning Gao<sup>13</sup>, Ignacio I. Wistuba<sup>11</sup>, John D. Minna<sup>13</sup>, Jeffrey McDonald<sup>2</sup>, and Pier Paolo Scaglioni<sup>1,\*</sup>

#### **Affiliations:**

<sup>1</sup> Department of Internal Medicine, University of Cincinnati College of Medicine, Cincinnati, OH 45219, USA.

<sup>2</sup> McDermott Center for Human Growth and Development, The University of Texas Southwestern Medical Center, Dallas, TX 75390, USA.

<sup>3</sup> Department of Neuroscience, The University of Texas Southwestern Medical Center, Dallas, TX 75390, USA

<sup>4</sup> Department of Interventional Radiology, The University of Texas MD Anderson Cancer Center

<sup>5</sup> Tissue Imaging and Proteomics Laboratory, Washington State University, Pullman, WA 99164.

<sup>6</sup> Sagimet Biosciences, San Mateo, CA 94402.

<sup>7</sup> Department of Pathology, University of Cincinnati College of Medicine, Cincinnati, OH 45219, USA.

<sup>8</sup> Yale Cancer Center, Yale School of Medicine, New Haven, Connecticut.

<sup>9</sup> Department of Surgery, Division of Thoracic Surgery, University of Cincinnati College of Medicine, Cincinnati, OH 45219, USA

<sup>10</sup> Department of Pathology, Fondazione IRCCS Istituto Nazionale dei Tumori di Milano, via Venezian 1, 20133 Milan, Italy

<sup>11</sup> Department of Translational Molecular Pathology,

<sup>12</sup> Department of Thoracic H&N Med Oncology, The University of Texas MD Anderson Cancer Center.

<sup>13</sup> Hamon Center for Therapeutic Oncology Research, The University of Texas Southwestern Medical Center, Dallas, TX 75390, USA.

# These authors contributed equally to this manuscript.

\* Corresponding author: Pier Paolo Scaglioni, The Vontz Center for Molecular Studies, 3125 Eden Avenue, Rm. 3118, Cincinnati, OH 45219-2293. Email: [Scaglipr@ucmail.uc.edu](mailto:Scaglipr@ucmail.uc.edu) Phone: 513-558-2115; FAX: 513-558-2125.

**Running title:** Mutant KRAS lung cancer depends on FASN and the Lands cycle

**Conflict of interest statement:** The authors declare no potential conflicts of interest.

## **Content**

Supplementary Tables 1 and 2

Supplementary Figures 1-11 and Supplementary Figure legends

### **Other Supplementary Materials for this manuscript include the following:**

Supplementary Data 1 to 9 as Excel files

Supplementary Videos 1-3

**Supplementary Table 1. List and characteristics of the primary human LC specimens.**

| <b>Biobank ID</b> | <b>KM</b> | <b>Diagnosis</b> | <b>Morphology</b> | <b>Age at Collection</b> | <b>Gender</b> | <b>Race</b> |
|-------------------|-----------|------------------|-------------------|--------------------------|---------------|-------------|
| L140              | Yes       | Lung Cancer      | Adenocarcinoma    | 81                       | Female        | White       |
| L550              | Yes       | Lung Cancer      | Adenocarcinoma    | 60                       | Female        | White       |
| THO744            | Yes       | Lung Cancer      | Adenocarcinoma    | 60                       | Female        | White       |
| L569              | No        | Lung Cancer      | Adenocarcinoma    | 70                       | Female        | White       |
| L584              | No        | Lung Cancer      | Adenocarcinoma    | 79                       | Male          | White       |
| THO703            | No        | Lung Cancer Mets | Adenocarcinoma    | 67                       | Female        | Asian       |

**Supplementary Table 2. List and characteristics of the LC PDXs. NSCLC, non-small cell lung cancer; AD, adenocarcinoma**

| <b>ID</b>      | <b>Tumor type</b> | <b>KRAS status</b> | <b>EGFR status</b> |
|----------------|-------------------|--------------------|--------------------|
| HCC4256-PDX-F0 | PDX-NSCLC         | G12C               | WT                 |
| LTL-618T       | PDX-NSCLC         | G12C               | WT                 |
| HCC4058-PDX-F1 | PDX-NSCLC         | G12D               | WT                 |
| HCC4059-PDX-F1 | PDX-AD            | G12V               | WT                 |
| LTL-656T       | PDX-AD            | G12V               | WT                 |
| HCC4271-PDX-F0 | PDX-NSCLC         | WT                 | WT                 |
| HCC4285-PDX-F0 | PDX-AD            | WT                 | WT                 |
| HCC4300-PDX-F0 | PDX-NSCLC         | WT                 | WT                 |
| HCC4307-PDX-F0 | PDX-AD            | WT                 | WT                 |
| HCC4190-PDX-F0 | PDX-AD            | WT                 | L858R              |
| LTL-347T       | PDX-AD            | WT                 | L858R              |

# Supplementary Figure 1

**a**

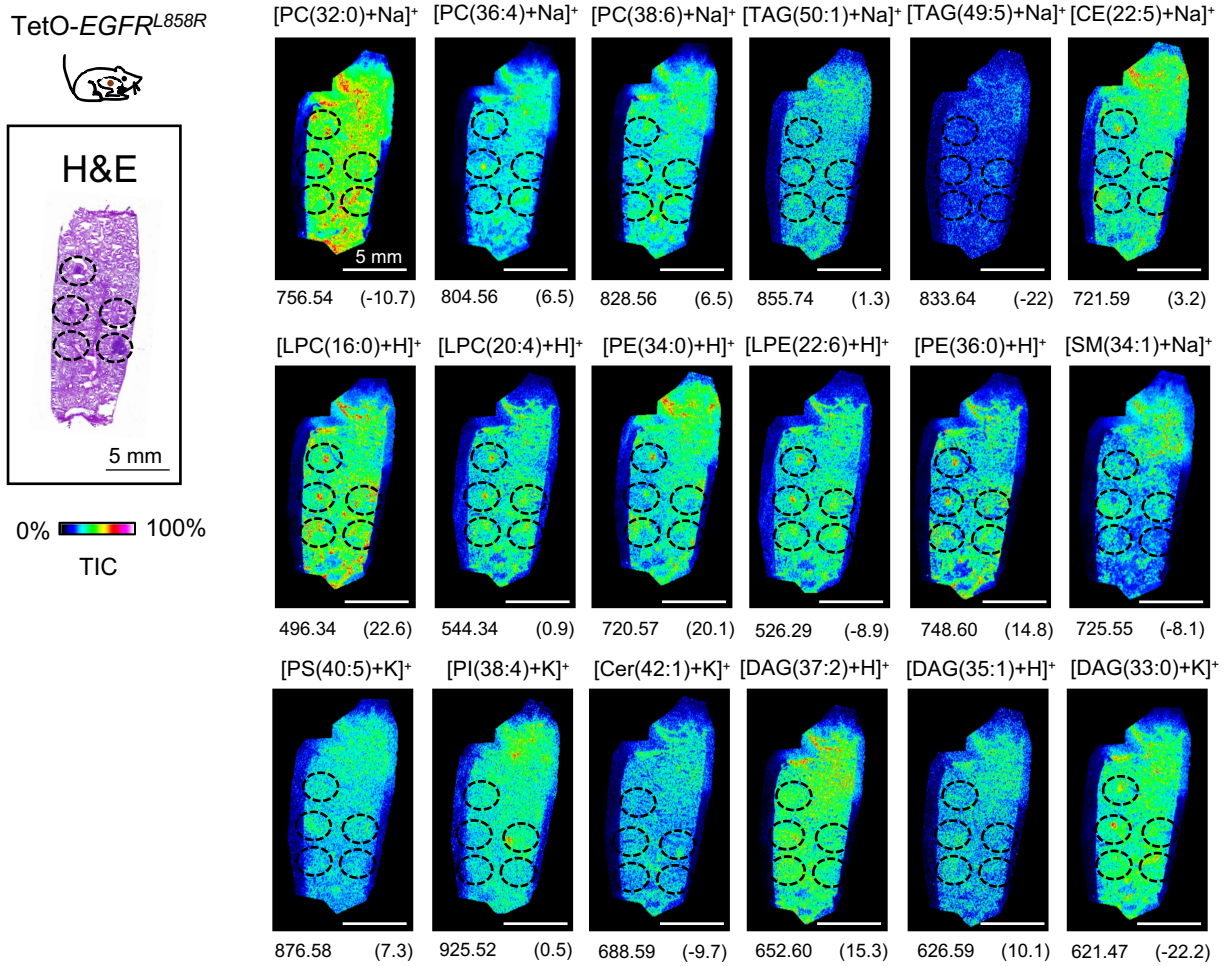

**b**

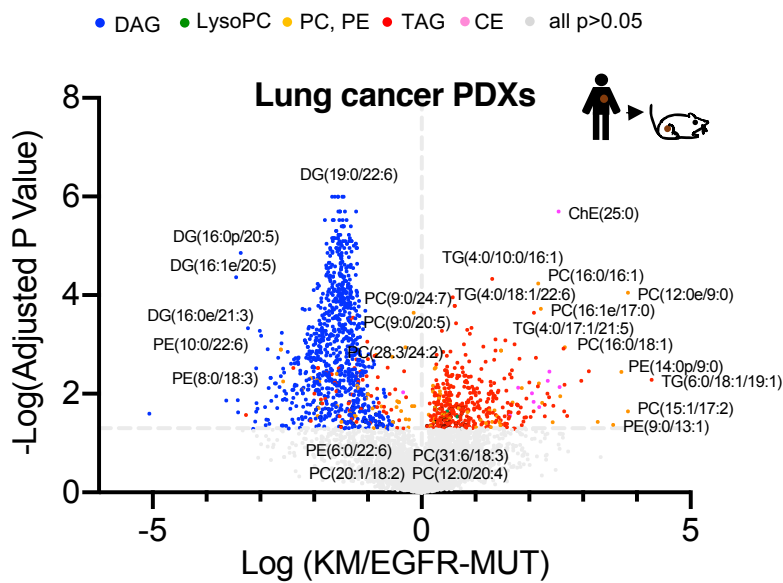

**c**

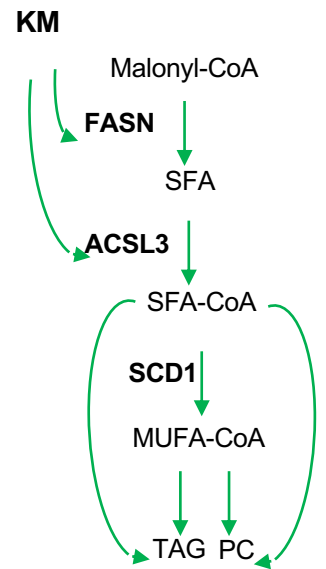

**Supplementary Figure 1. Mutant EGFR LC and KMLC have distinct lipidomic profiles. (a)** H&E staining and MALDI imaging pictures of TetO-*EGFR*<sup>L858R</sup> lungs (n=2 biologically independent experiments). Rainbow scale represents % ion intensity normalized against the total ion count (TIC). Circles indicate tumor areas. Observed m/z and mass error (ppm) values are indicated for each lipid species. Refer to Supplementary Data 1 and 4 for the complete tentative MALDI lipid annotation and relative quantification **(b)** HPLC-MS/MS analysis of EGFR-MUT (n=2) and KM (n=5) lung cancer patient-derived xenografts (PDXs). P values and difference (EGFR-MUT *versus* KM) were calculated using multiple t tests (p<0.05). **(c)** Proposed mechanisms of KM-dependent regulation of lipid synthesis in lung cancer. KM activates *FASN* and *ACSL3* which synthesize saturated fatty acids (SFA) and SFA-CoAs respectively. SFA-CoAs are either desaturated by SCD1 to monounsaturated FA (MUFA-CoAs) or directly used for the synthesis of TAG and PC.

# Supplementary Figure 2

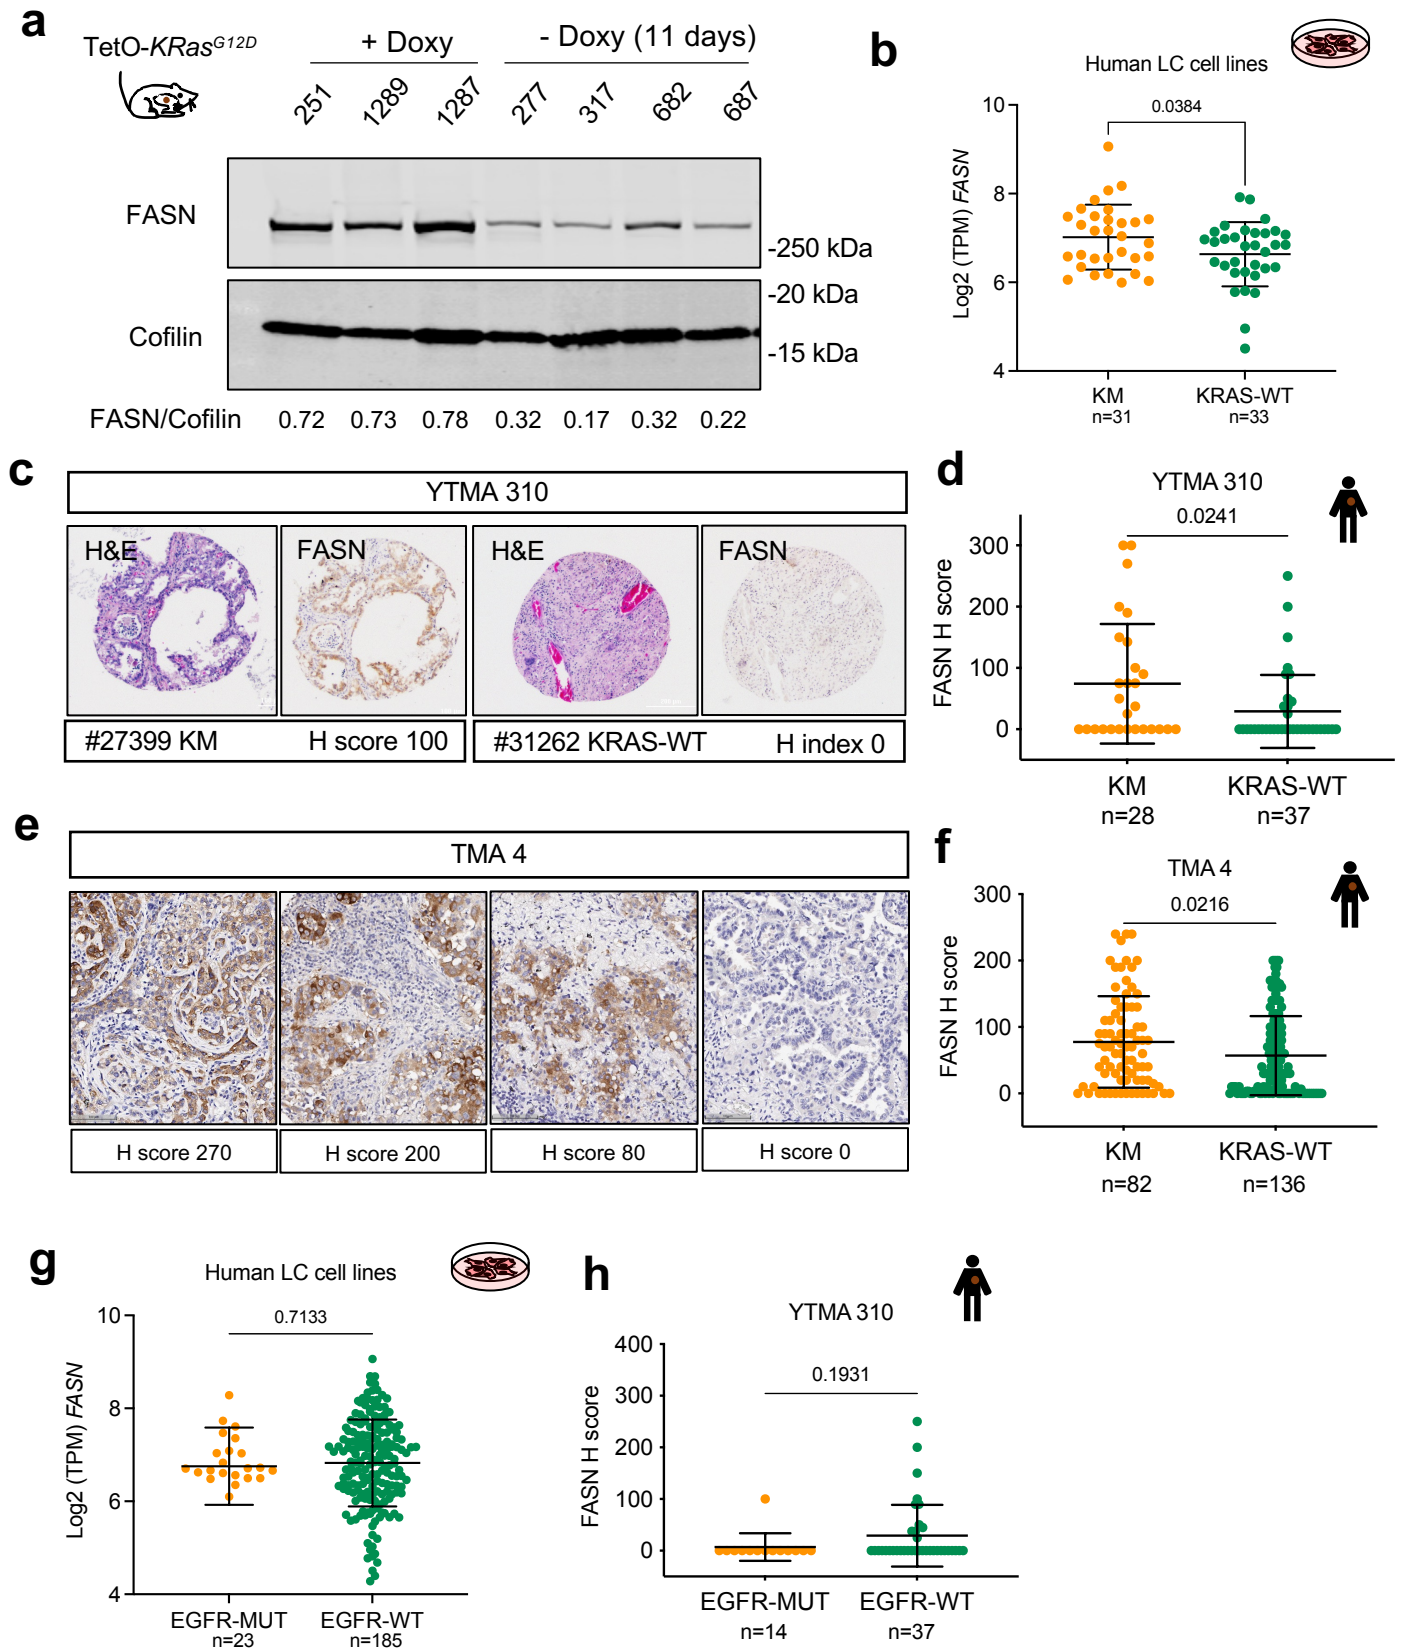

**Supplementary Figure 2. FASN is upregulated in KMLC.** **(a)** Immunoblot analysis of FASN in micro-dissected lung tumors of CC10rtTA; TetO-*Kras*<sup>G12D</sup> mice +/-doxy for the indicated number of days (n=2 independent experiments). **(b)** FASN expression in human non-small cell lung cancer (NSCLC) cell lines from the cancer cell line encyclopedia (CCLE) of the indicated genotype. TPM, transcript per million. n=number of cell lines. **(c, d)** Representative images of FASN immunostaining in LC specimens of YTMA 310 and its H-score quantification. n=number of cores. **(e, f)** Representative images of FASN immunostaining in LC specimens of TMA 4 and its H-score quantification. n=number of cores. **(g)** *FASN* expression in human cell lung cancer cell lines from the cancer cell line encyclopedia (CCLE) of the indicated genotype. Data are expressed as mean  $\pm$  SD. **(h)** FASN H-score quantification of EGFR-MUT and EGFR-WT cores in YTMA 310 (n=number of cores). In (b), (d), (f), (g), (h) two-tailed unpaired Student's t test.

# Supplementary Figure 3

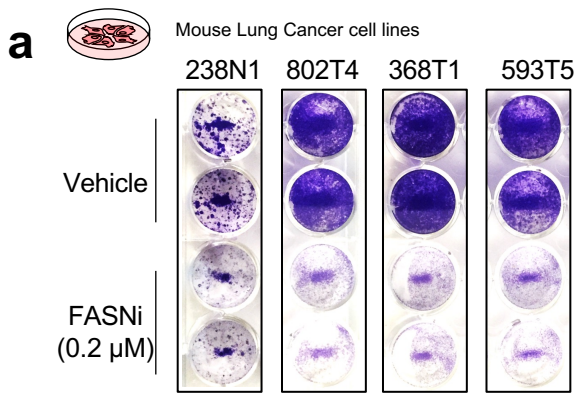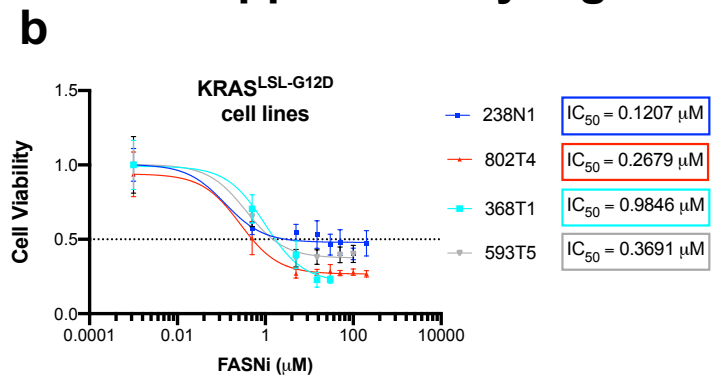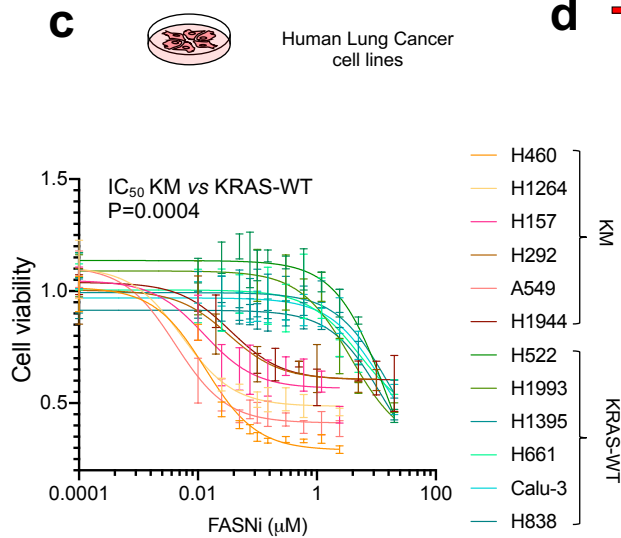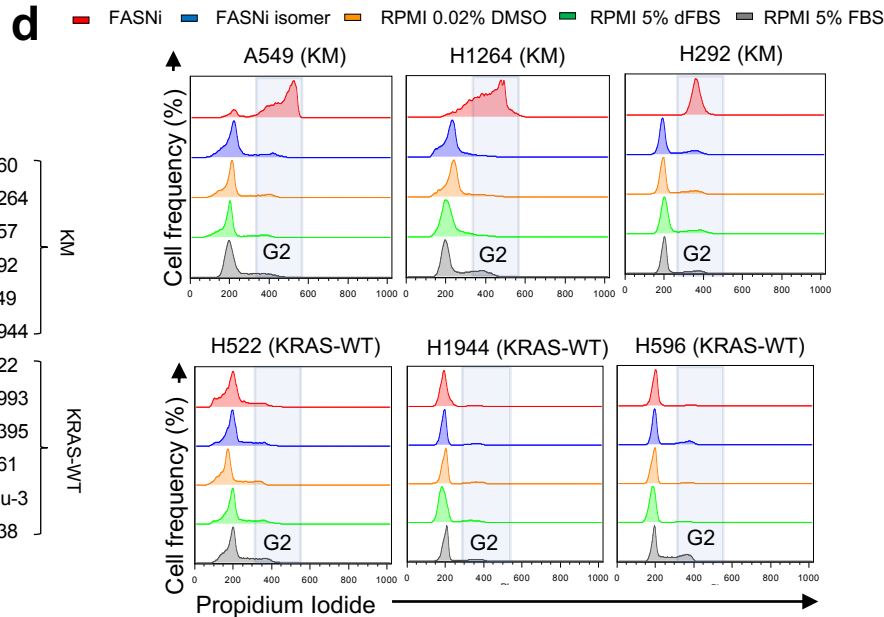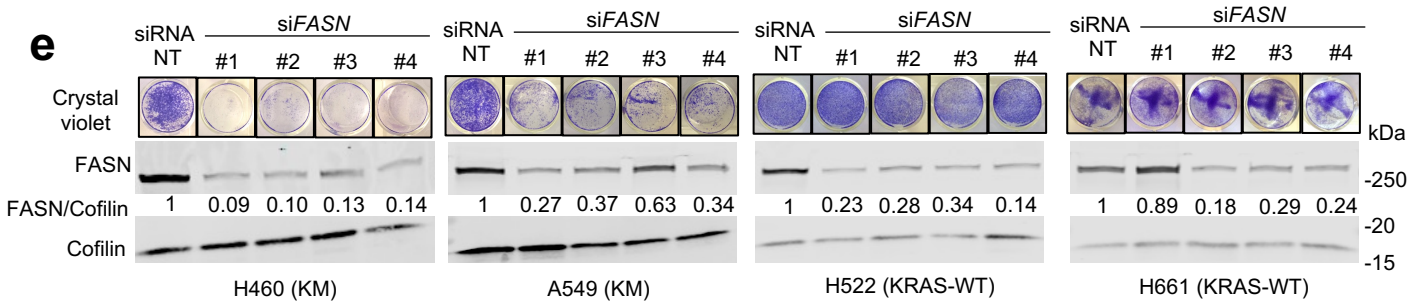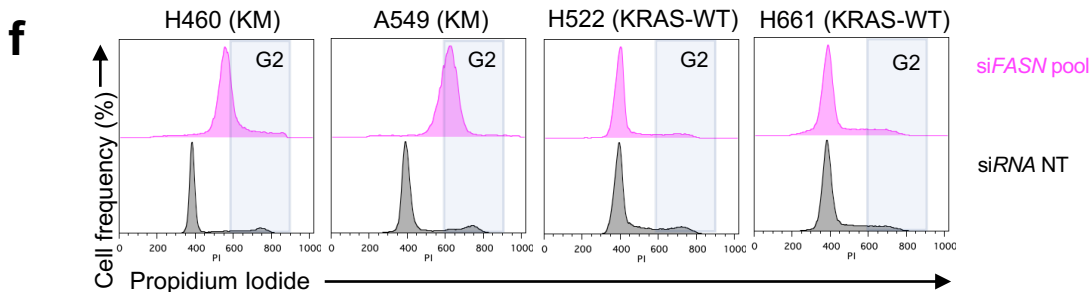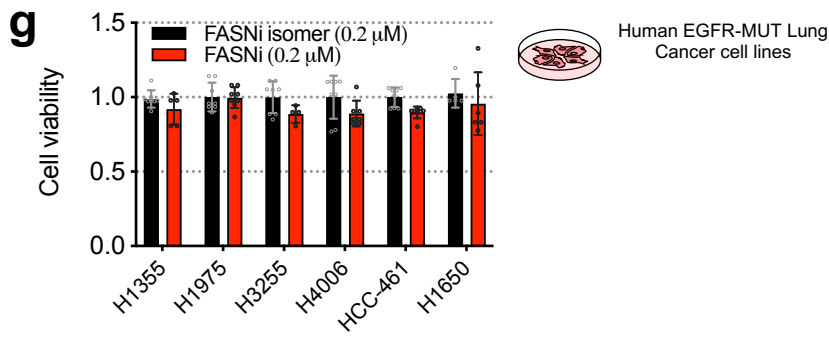



**Supplementary Figure 3. FASN is a selective vulnerability of KMLC.** (a) Crystal violet and (b) MTT viability assays of the indicated murine LSL-*Kras*<sup>G12D</sup> cell lines treated as indicated. IC<sub>50</sub>, inhibitory concentration 50 (n=4 biologically independent cell lines). (c) MTT viability assay on the indicated human KM and KRAS-WT LC cell lines treated as indicated (n=6 biologically independent cell lines each genotype). IC<sub>50</sub> values were determined using non-linear regression and P value indicates two-tailed unpaired Student's t test of IC<sub>50</sub> values KM *versus* KRAS-WT. (d) Cell cycle analysis on the indicated human LC cell lines treated as indicated. RPMI 5% FBS = regular medium; RPMI 5% dFBS= medium with dialyzed FBS; RPMI 0.02% DMSO = vehicle. Cell populations indicate singlets in FL2-W/FL2-A gate. Refer to Supplementary Figure 11 for a representative gating strategy. (e) Crystal violet assay of the indicated cells transfected with the indicated siRNAs and correspondent immunoblot of FASN. NT, non-targeting. (f) Cell cycle analysis of KM and KRAS-WT LC cells transfected with the indicated siRNAs. siRNA FASN pool = siFASN #1-4. Cell populations indicate singlets in the FL2-W/FL2-A gate. Refer to Supplementary Figure 11 for a representative gating strategy. (g) Cell viability assay in EGFR-MUT LC cell lines treated as indicated for 7 days (n=6 biologically independent cell lines each genotype). In b, c, g data are represented as mean ± SD.

# Supplementary Figure 4

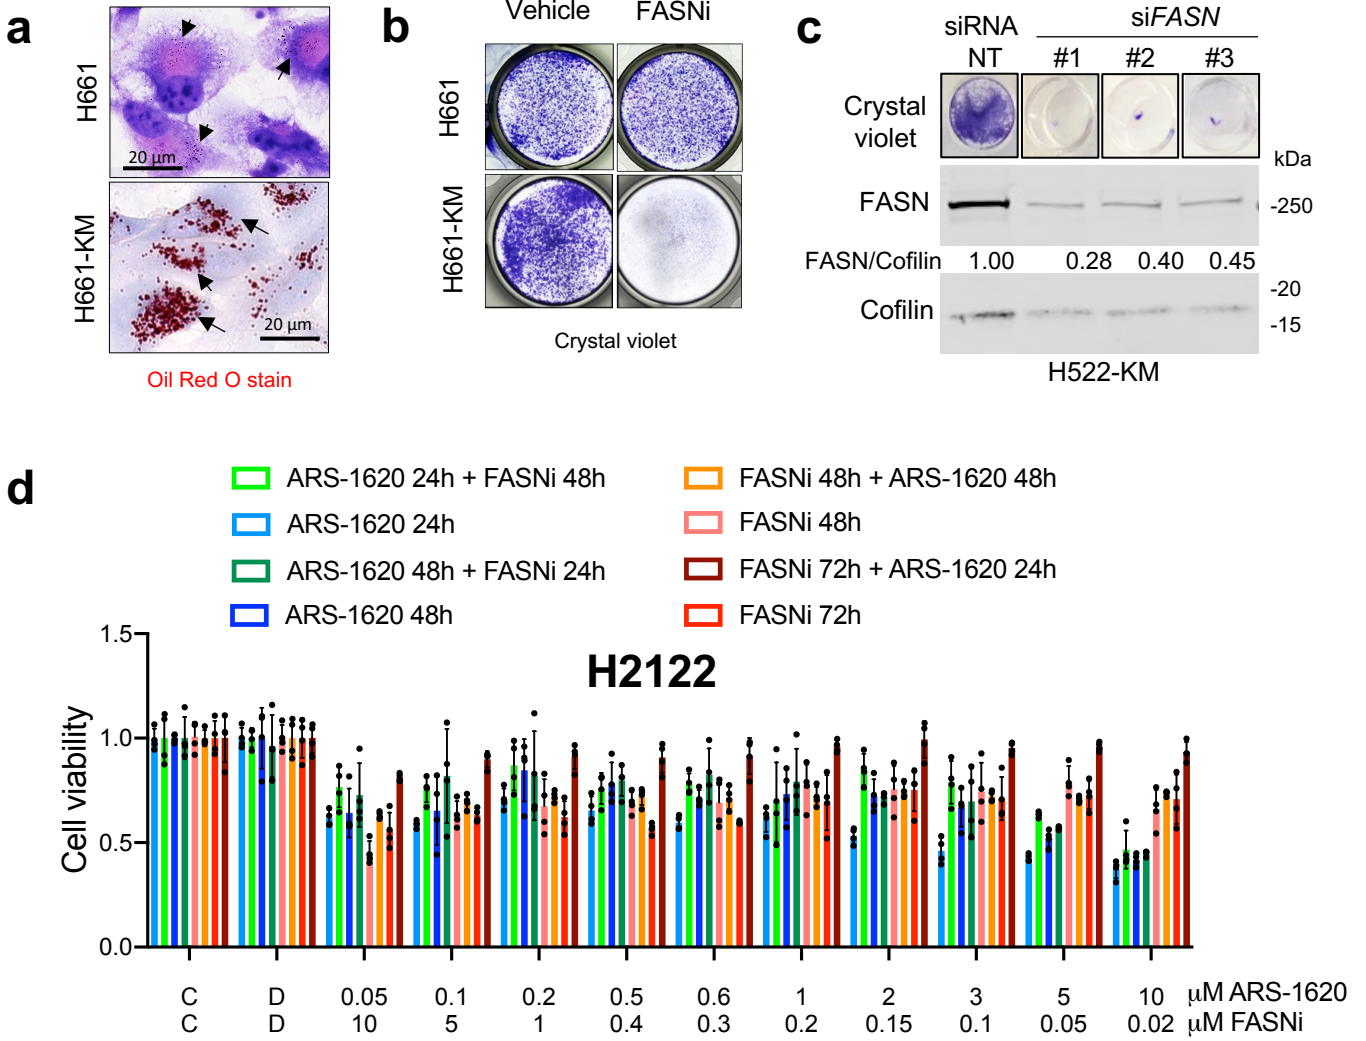

**Supplementary Figure 4. KM is sufficient to induce dependency on FASN.** (a) Oil red O staining for lipid droplets in the H661 (KRAS-WT) parental cell line and H661 transduced with KM (n=2 biological independent experiments). (b) Crystal violet assay of the indicated cell lines treated with vehicle or FASNi (0.2  $\mu$ M). (c) Crystal violet assay of H522-KM cells transfected with the indicated siRNAs and correspondent immunoblot of FASN. NT, not targeting. (d) MTT cell viability assay in KM-G12C cell line H2122 treated as indicated (n=4 biologically independent samples). Data are represented as mean  $\pm$  SD.

# Supplementary Figure 5

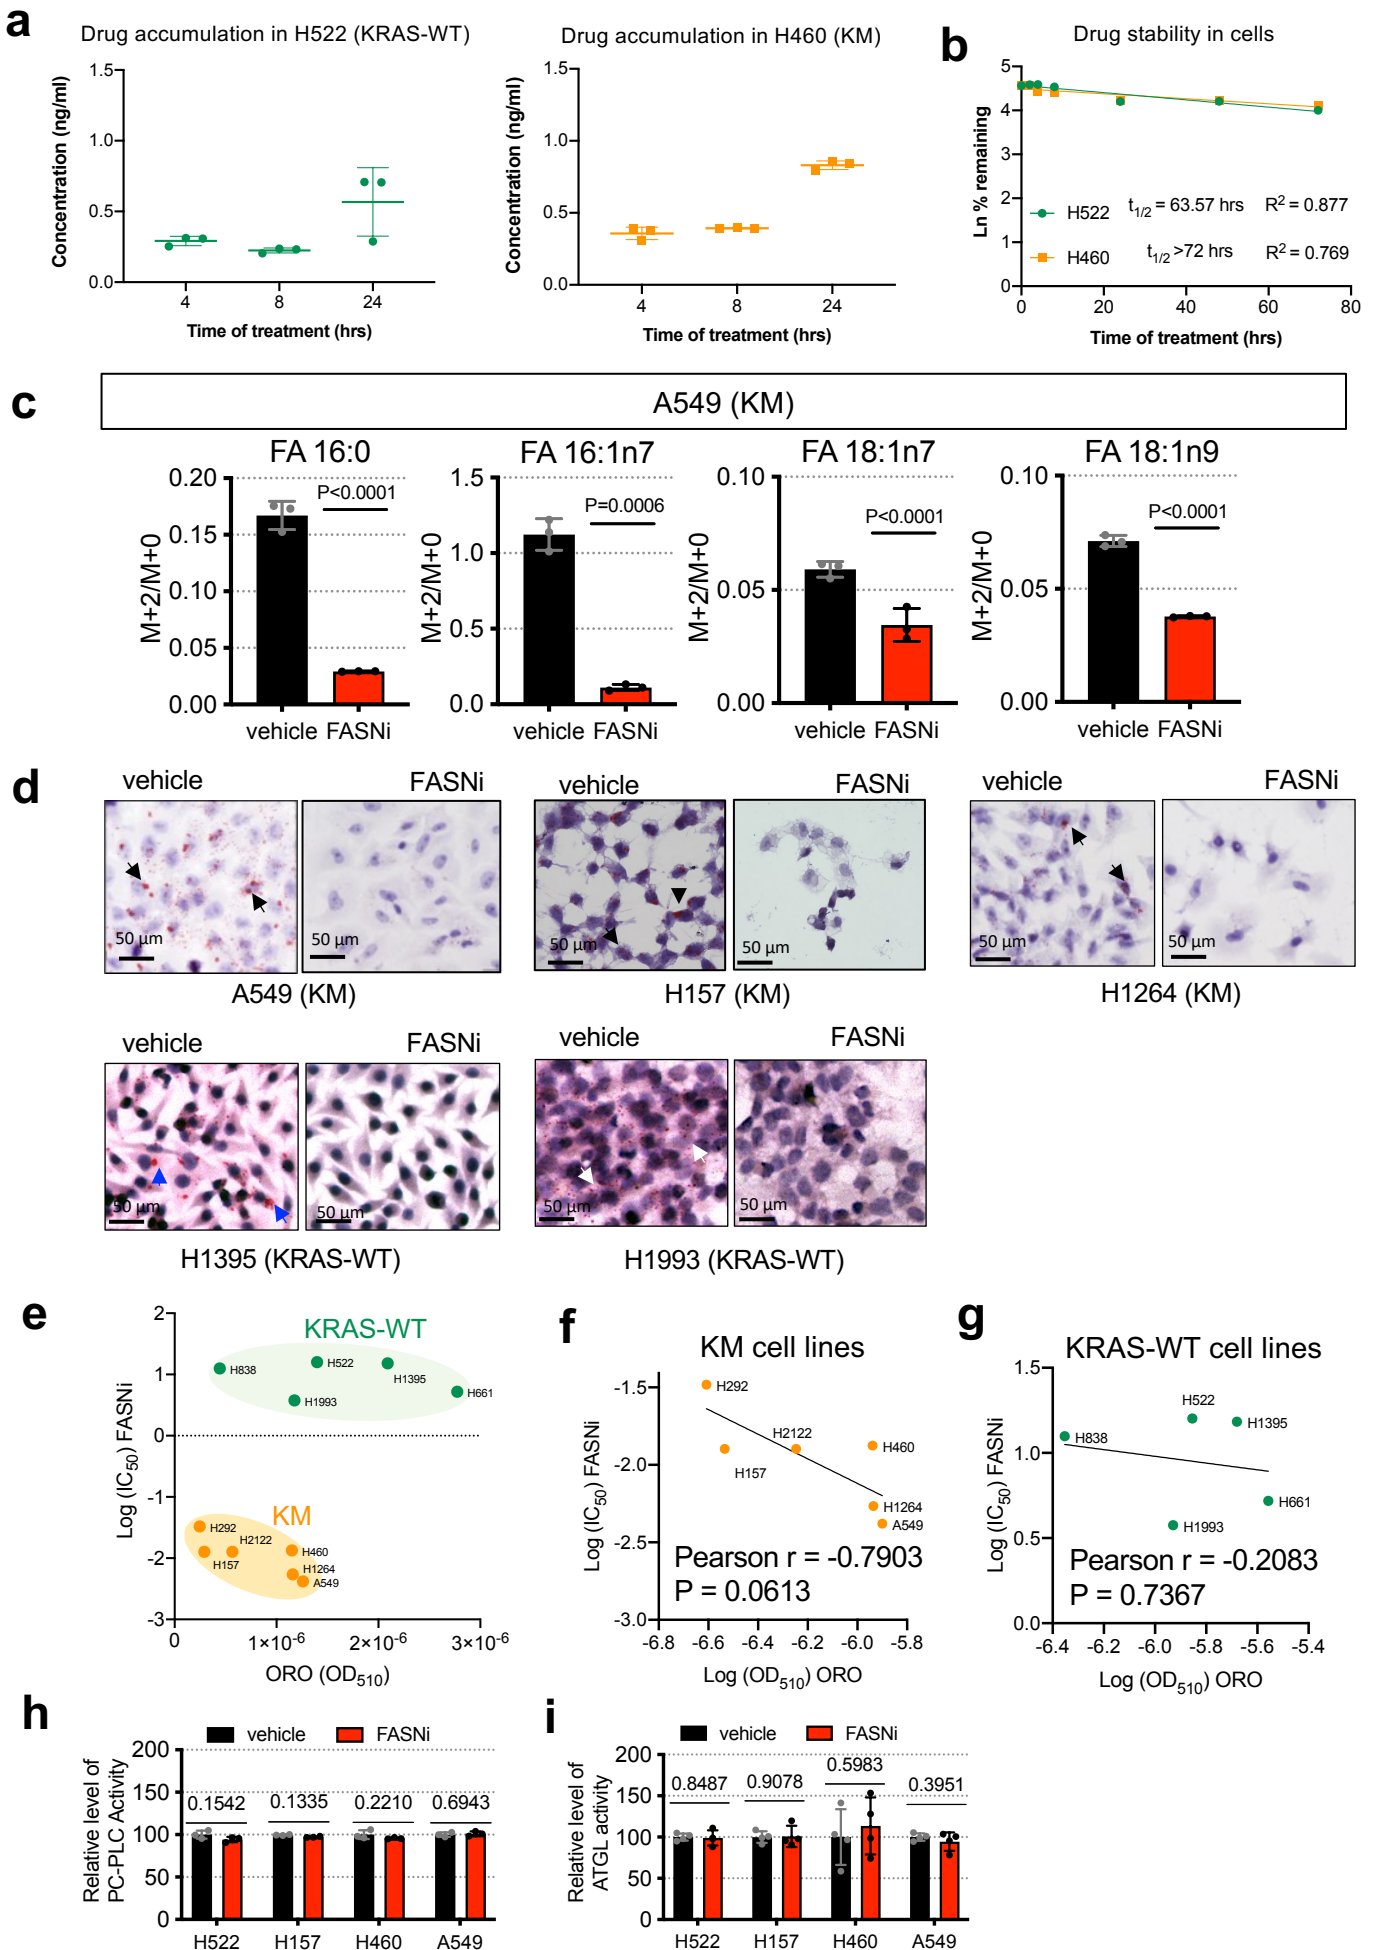

**Supplementary Figure 5. FASNi uptake, stability and activity in KM and KRAS-WT LC.**

**(a, b)** Intracellular accumulation and stability of FASNi in H522 (KRAS-WT) and H460 (KM) cell lines (n=3 replicates) assessed by LC/MS.  $t_{1/2}$ = drug half-life. **(c)** Quantification of newly synthesized FA via GC/MS in A549 cells treated as indicated. M+2/M+0 ratio is reported. Palmitate, FA 16:0; palmitoleate, FA 16:1n7; stearate, FA 18:0; vaccenate, FA 18:1n7; oleate, FA 18:1n9 (n=3 independent experiments). Data are reported mean  $\pm$  SD. **(d)** Oil red O staining for detection of lipid droplets (arrows) in the indicated cell lines (n=2 independent experiments). **(e)** Principal component analysis plot performed using Oil Red O (ORO) OD510 and correspondent Log(IC<sub>50</sub>) FASNi of the indicated cell lines. **(f)** Pearson correlation between ORO (OD<sub>510</sub>) and correspondent Log(IC<sub>50</sub>) FASNi in KM and **(g)** KRAS-WT LC cell lines. P values >0.05, not significant. **(h, i)** Relative activity of PC-specific phospholipase C (PC-PLC) and of adipose triglyceride lipase (ATGL) in the indicated LC cell lines (n=3 and n=4 biologically independent samples). Data are expressed as mean  $\pm$  SD (a, b-d, g, h). Statistical significance was assessed using unpaired two-tailed Student's t test.

# Supplementary Figure 6

**a**

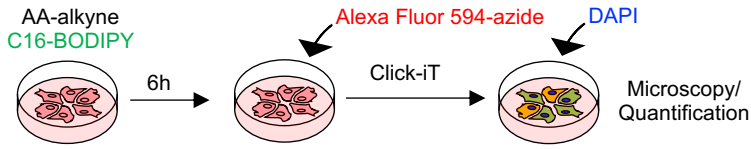

Arachidonic Acid (AA) Alkyne-Alexa Fluor 594/C16-BODIPY/DAPI

**b**

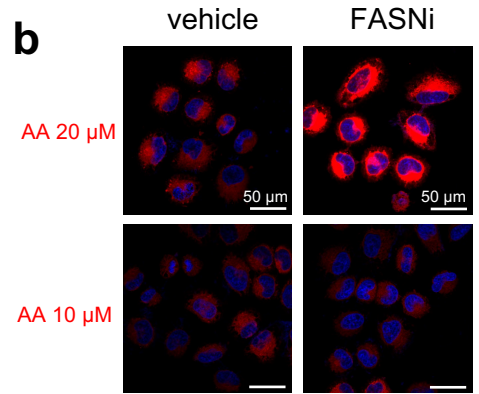

**c**

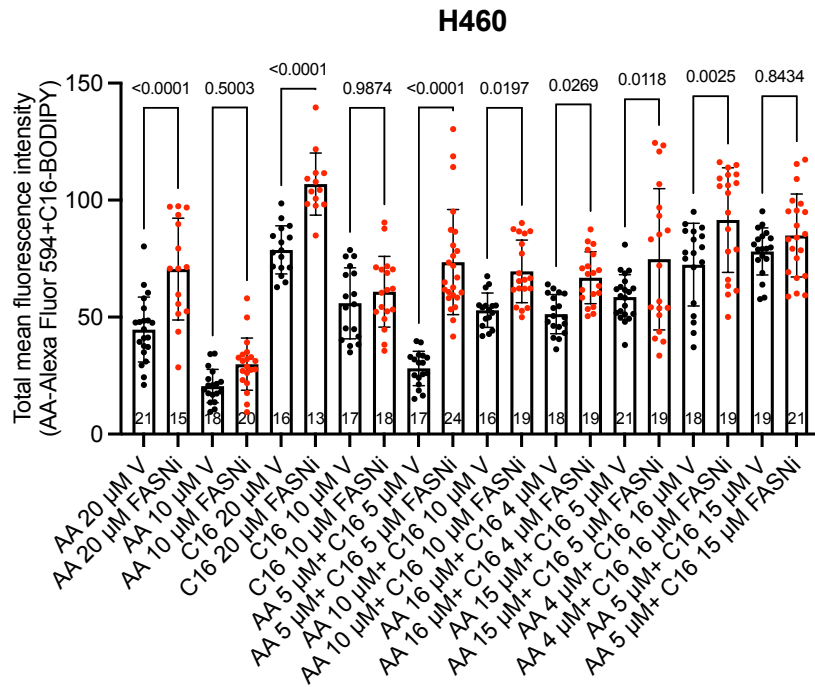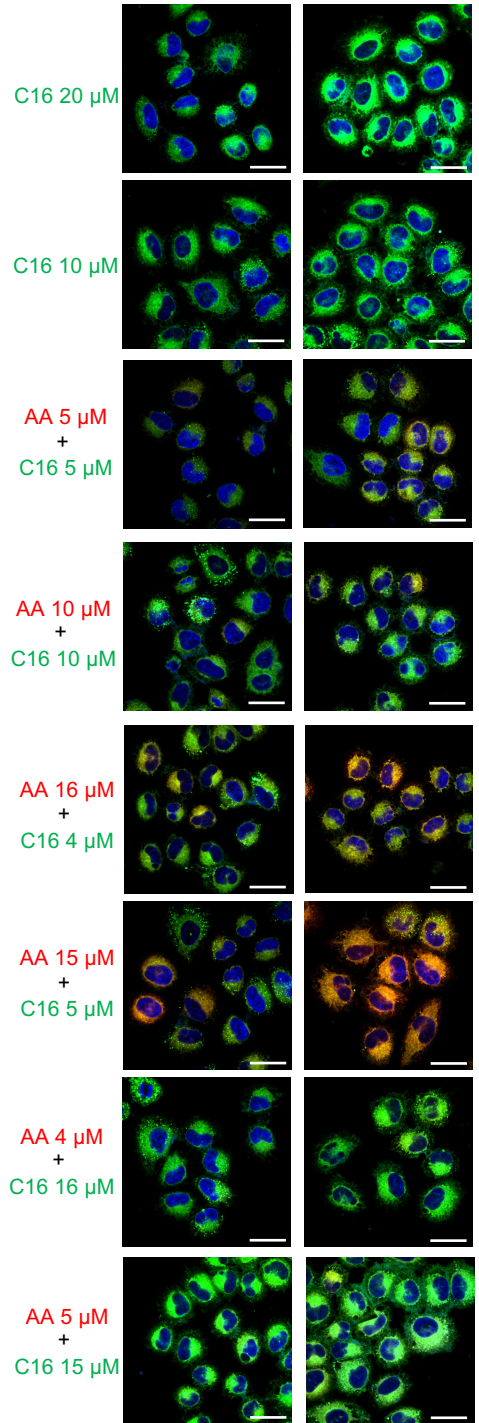

**d**

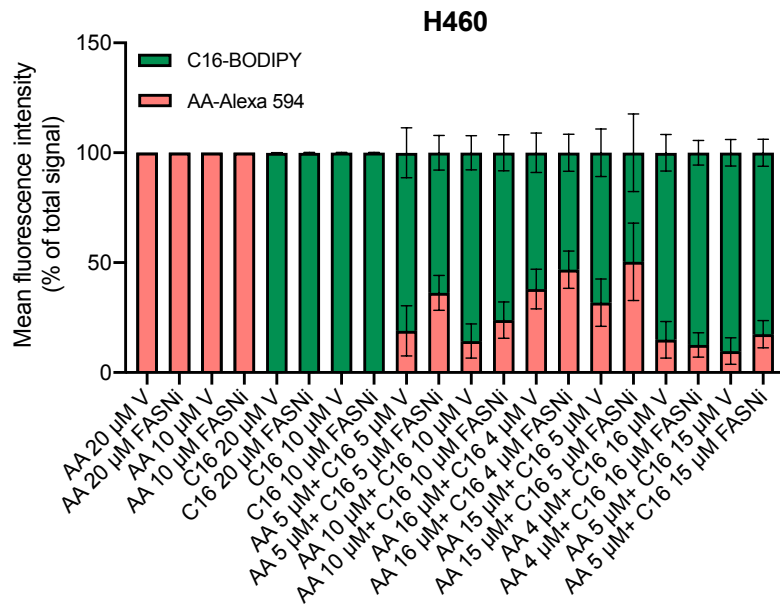

H460

**Supplementary Figure 6. Extracellular availability of PUFA/SFA dictates their uptake by KMLC cells.** (a, b) Schematic and representative images of the FA uptake assay. AA, Arachidonic acid. C16, palmitate. (c) Quantification of the total FA uptake by H460 KMLC cells under the indicated conditions. n in the bars represents number of cells analysed in 2 biologically independent samples. Data are expressed as mean  $\pm$  SD (d) Relative quantification of AA (red) and C16 (green) uptake by H460 cells under the indicated conditions. Data are expressed as mean  $\pm$  SD and represents % of total mean fluorescence intensity signal (BODIPY + Alexa 594). In (c) multiple t test.

# Supplementary Figure 7

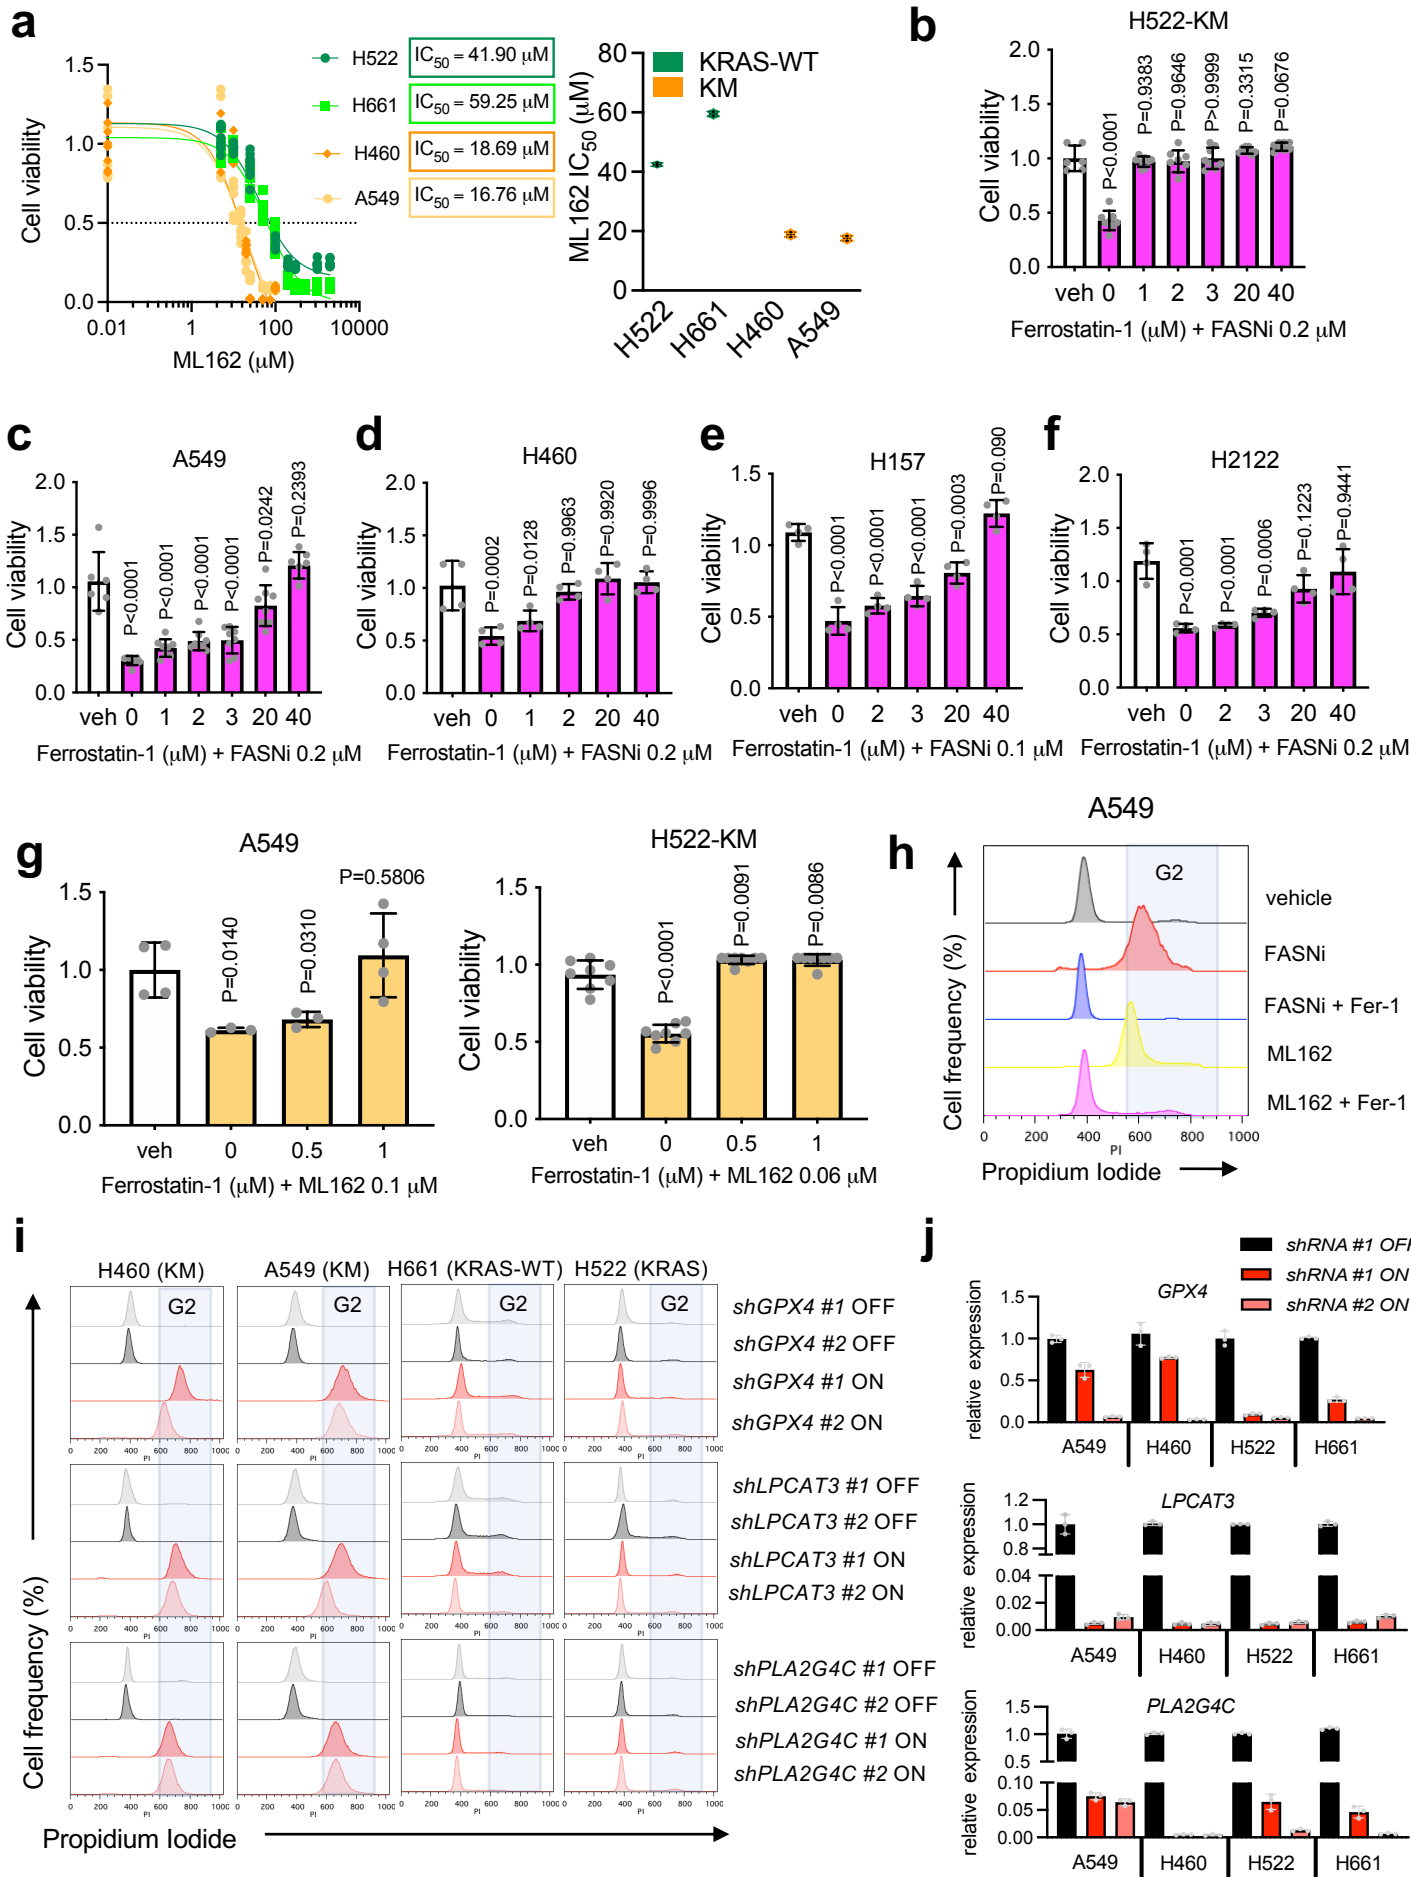



**Supplementary Figure 7. KM expression lowers the threshold to ferroptosis induction. (a)** MTT viability assay of the indicated KM and KRAS-WT LC cells treated with increasing concentrations of ML162 (GPX4 inhibitor). IC<sub>50</sub> values are represented in the bar graph (n=2 independent experiments). **(b-f)** MTT viability assay of the indicated cell lines treated with FASNi or **(g)** ML162 in combination with increasing concentration of the ferroptosis inhibitor Ferrostatin-1. **(h, i)** Cell cycle analysis of the indicated cell lines treated as reported or transfected with the indicated inducible shRNAs. OFF/ON = +/- doxy. Cell populations indicate singlets in the FL2-W/FL2-A gate. Refer to Supplementary Figure 11 for a representative gating strategy **(j)** RNA expression of *GPX4*, *LPCAT3* and *PLA2G4C* before or after induction of the shRNAs (n=3 biologically independent samples). Bars represent mean ± SD. In (c, d) unpaired two-tailed student t test.

# Supplementary Figure 8

**a**

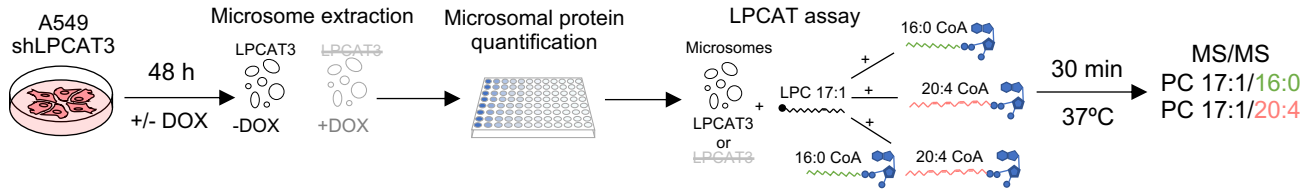

**b**

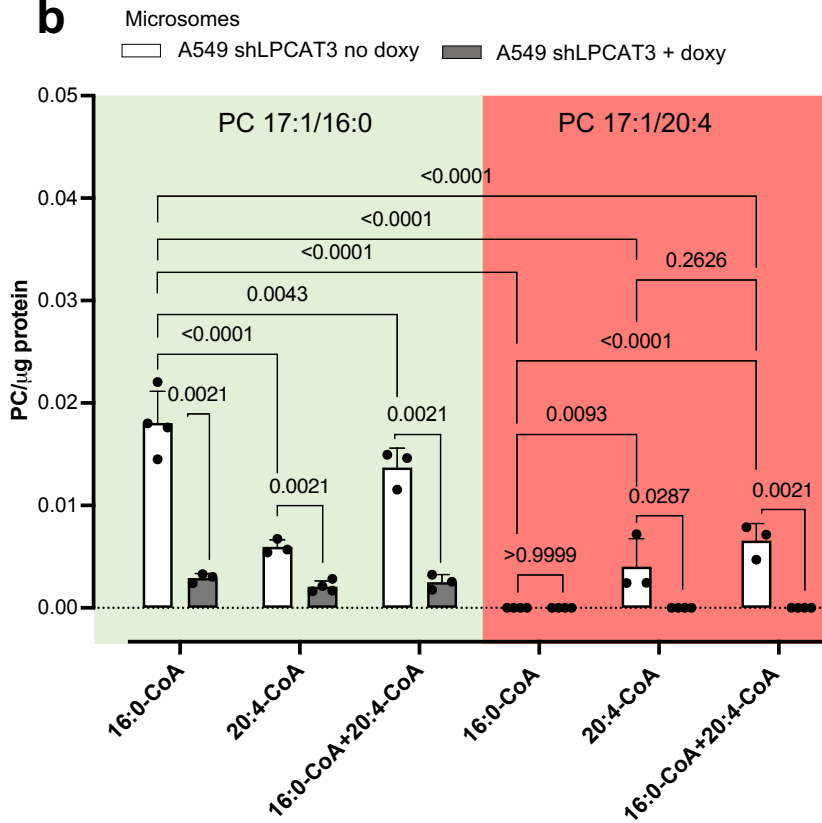

**c**

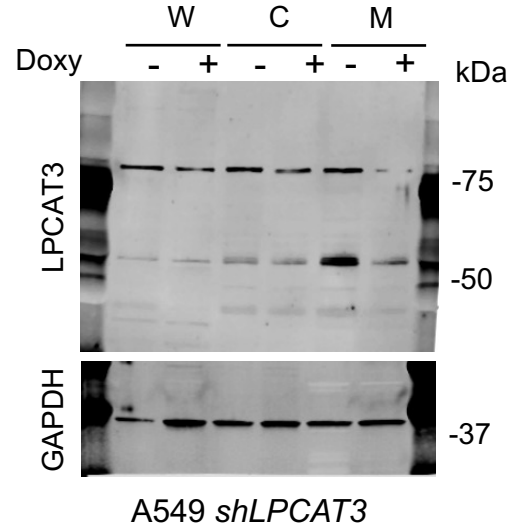

**Supplementary Figure 8. LPCAT3 substrate choice is determined by PUFA and SFA availability in KMLC. (a)** Schematic representation of the experimental approach. **(b)** HPLC-MS/MS quantification of PC 17:1/16:0 and PC 17:1/20:4 deriving from re-acylation of exogenously provided LysoPC 17:1 with either 16:0-CoA or 20:4 CoA, in presence of microsomes +/- doxy (*i.e.* +/- *shLPCAT3*). Data are expressed as mean  $\pm$  SD (n=3 biologically independent samples). **(c)** Immunoblot for LPCAT3 and GAPDH on whole cell (W), cytoplasmic (C) and microsomal (M) lysates of A549 *shLPCAT3* +/- doxy (n=2 independent experiments). In (b) multiple unpaired two-tailed t test followed by Benjamini, Krieger and Yekutieli FDR.

# Supplementary Figure 9

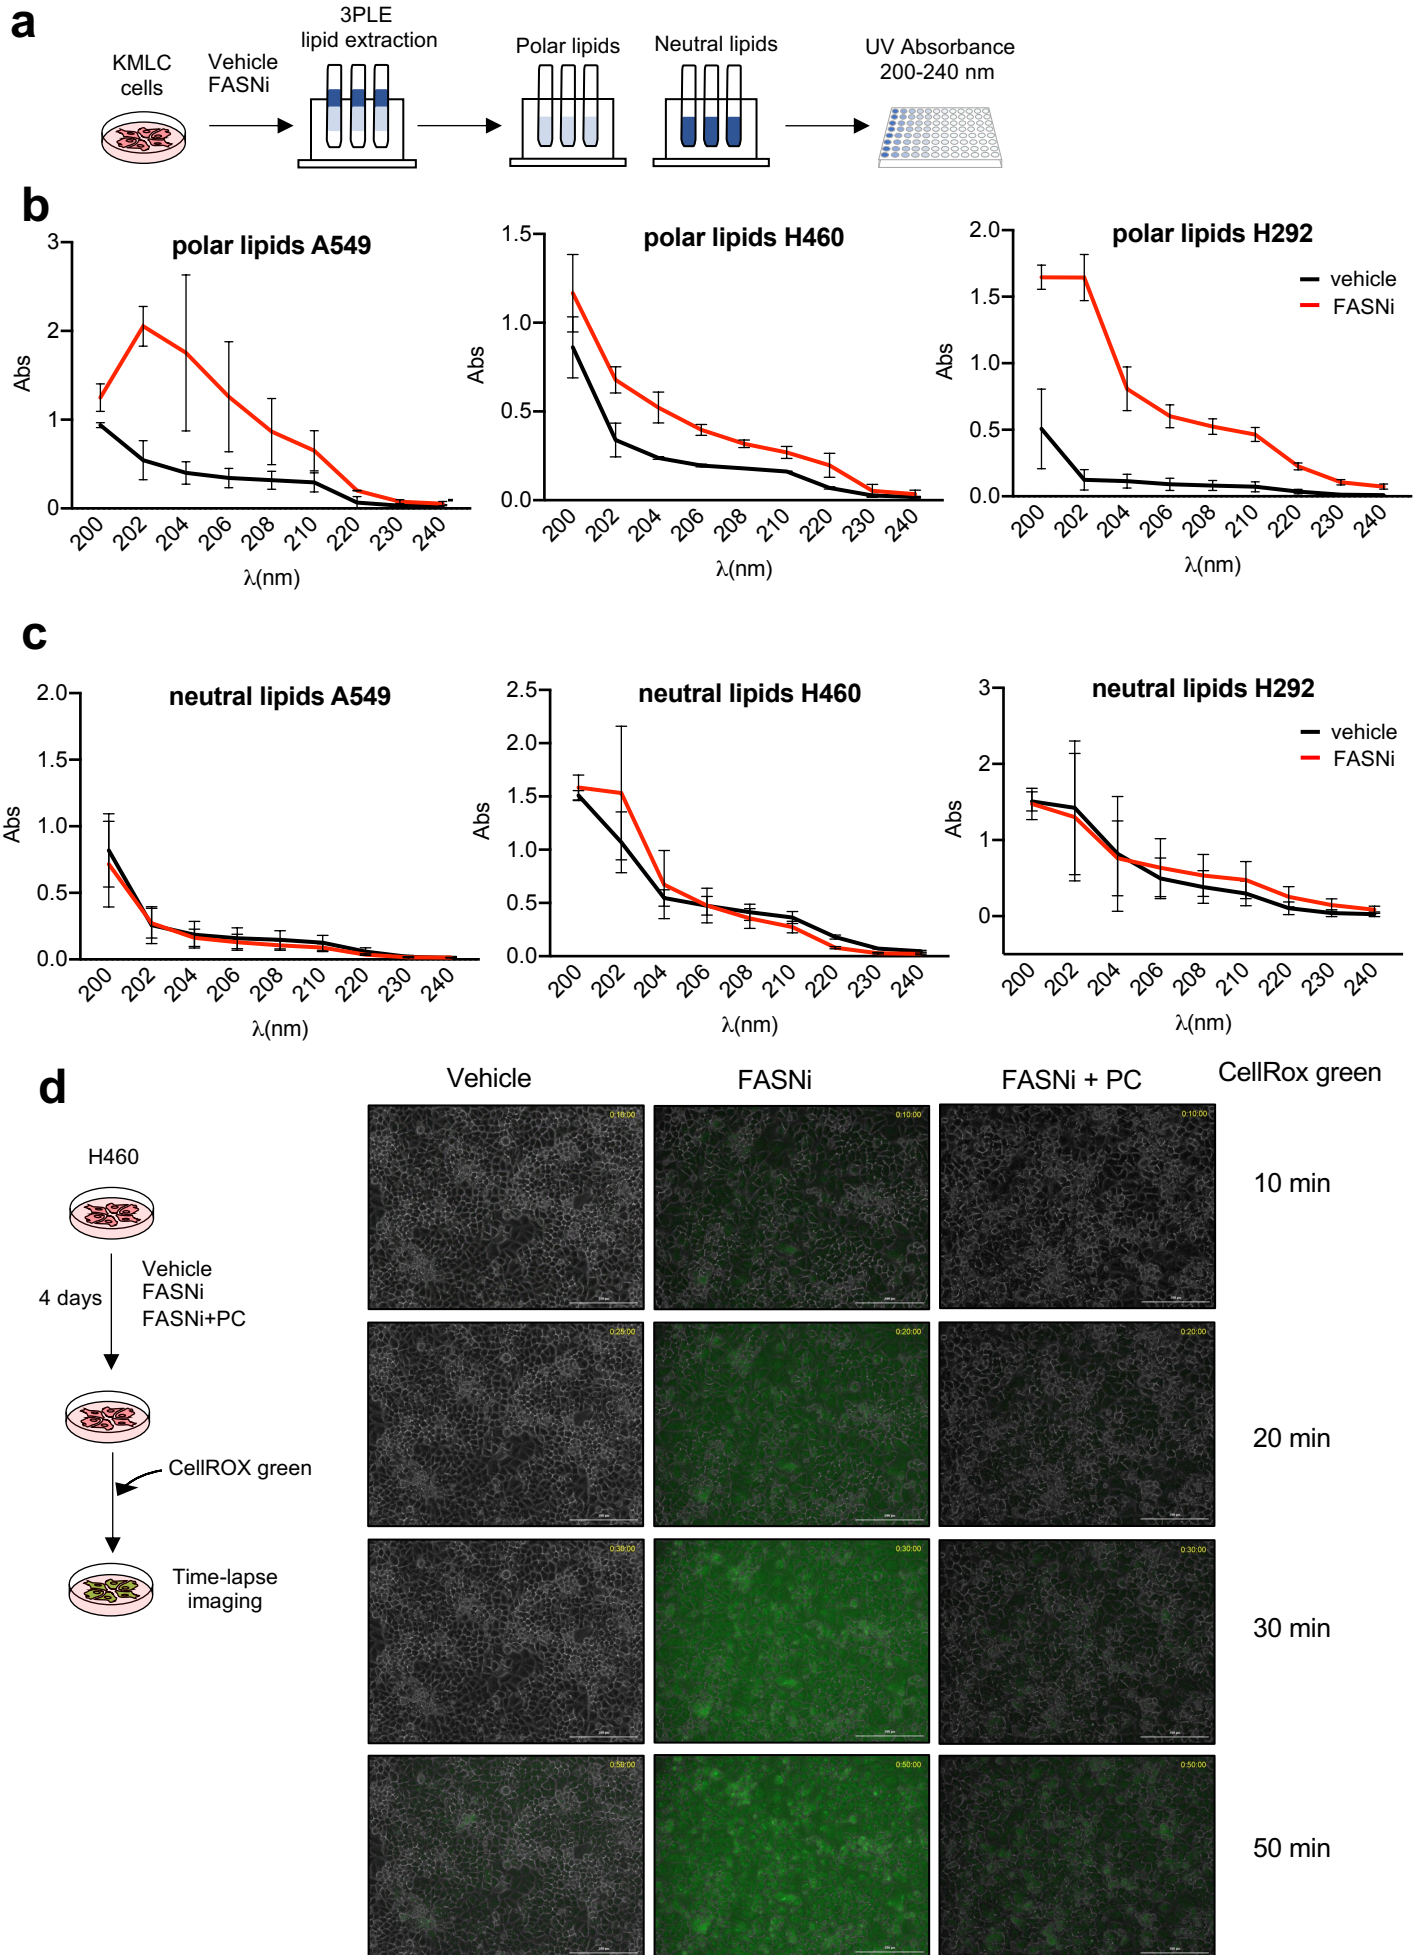

**Supplementary Figure 9. FASNi causes phospholipid peroxidation.** (a) Schematic workflow and (b, c) quantification of lipid peroxidation by UV absorbance in the polar and neutral lipid fractions of the indicated KMLC cell lines (for A549 n=2, for H460 and H292 n=3 biologically independent experiments. Data are expressed as mean  $\pm$  SD. (d) Representative time lapse snapshots of ROS production in H460 treated as indicated. CellROX green accumulation indicates oxidative stress. See also Supplementary videos 1-3.

# Supplementary Figure 10

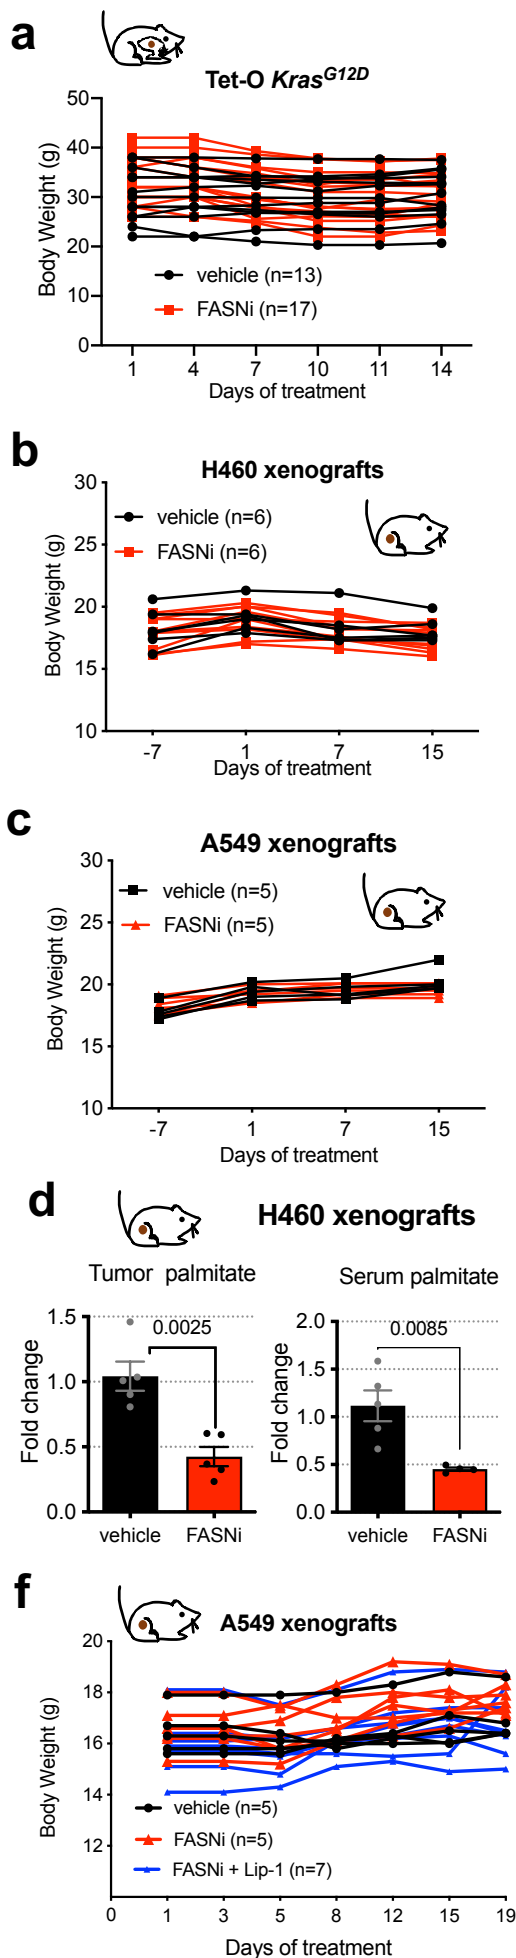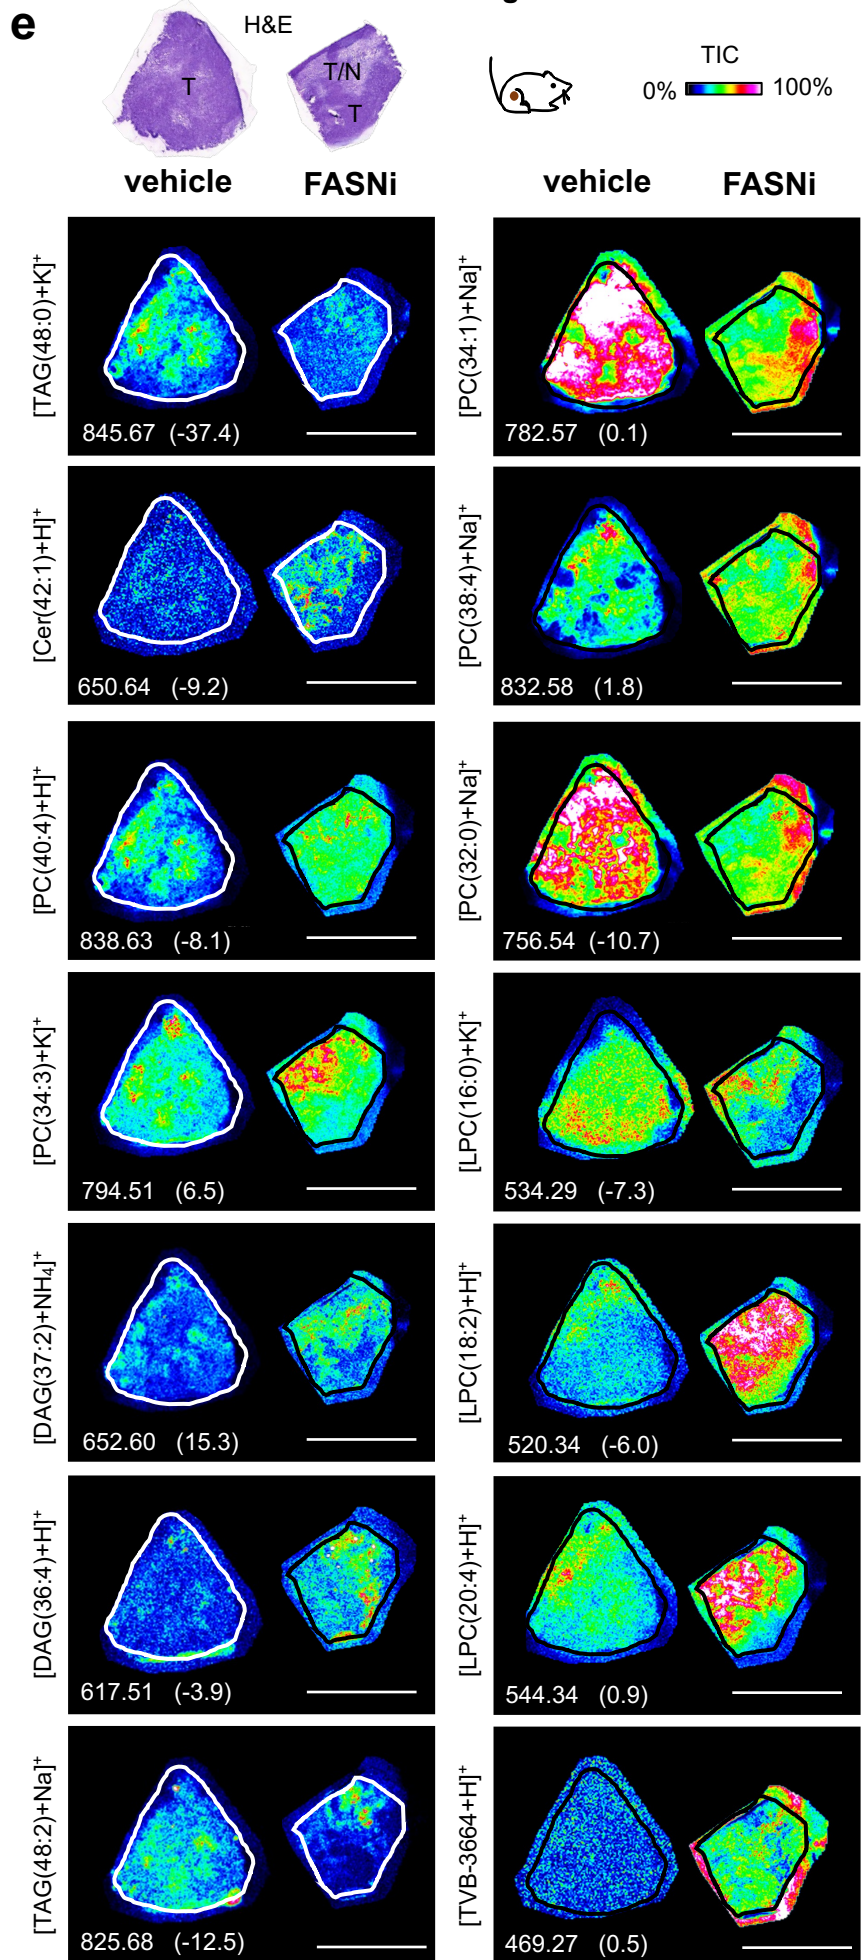

**Supplementary Figure 10. Body weight, palmitate quantification and MALDI imaging of KMLC mouse models.** (a-c) Body weight of TetO-*Kras* and xenograft-bearing mice treated as indicated. (d) Palmitate quantification in xenografts and sera of NOD/SCID mice (n=5 mice/group). Data are expressed as mean  $\pm$  SD. Statistics indicates unpaired two-tailed t test. (e) Representative MALDI images of the indicated lipid species in A549 xenografts. Rainbow scale represents % ion intensity normalized against the total ion count (TIC). Corresponding H&E and histological annotation are shown. T, tumor; N, necrotic area. Observed m/z and mass error (ppm) values are indicated for each lipid species. Refer to Supplementary Data 1 and 8 for the complete tentative MALDI lipid annotation and relative quantification (f) Body weight of A549 xenograft-bearing mice treated as indicated. Lip-1, liproxstatin-1.

# Supplementary Figure 11

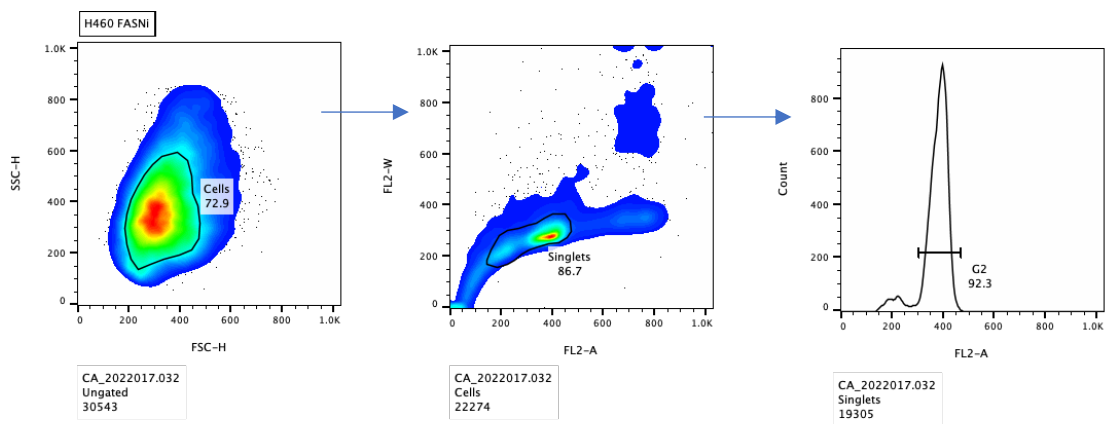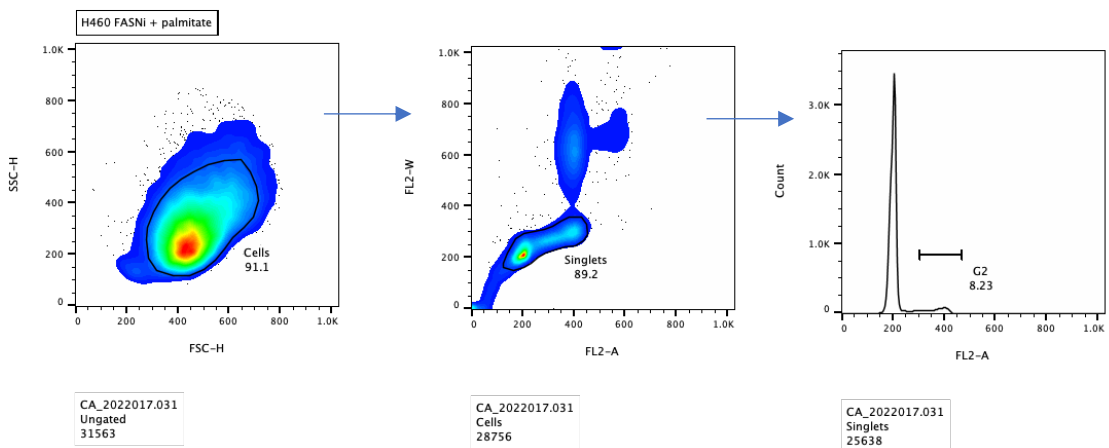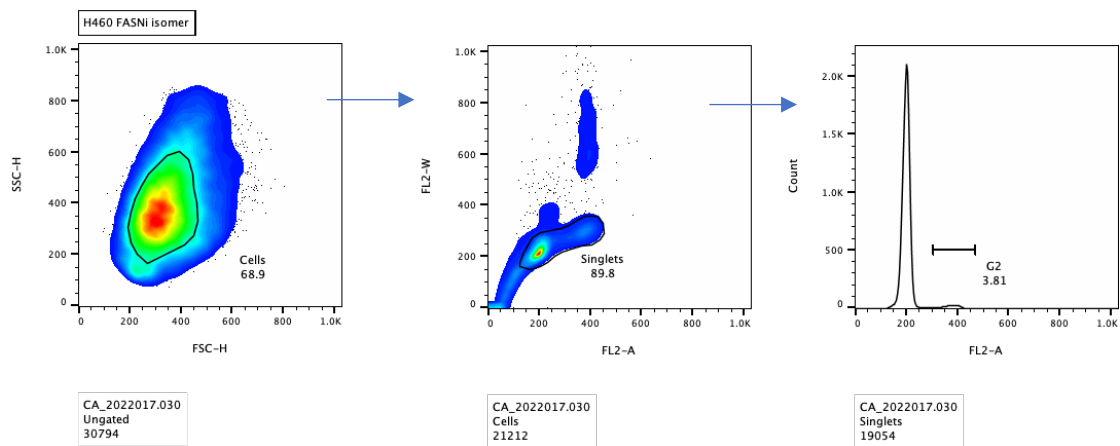



**Supplementary Figure 11. Gating strategy for cell cycle facs experiments.** Cell population is gated in SSC-H/FSC-H to remove debris (gate “Cells”). “Cells” population is then gated in FL2-W/FL2-A to select only single cells (gate “Singlets”). The “Singlets” population is represented as histogram over FL2-A. G2 peak is gated in the “Singlets”.
